# Supplementary material for: Antimetastatic Effects of Ganoderma lucidum Polysaccharide Peptide on B16-F10-luc-G5 Melanoma Mice With Sleep Fragmentation
Source: PubMed Central journal article supplement (PMC8296642; doi:10.3389/fphar.2021.650216), 2021-07-08
Supplement: Table1.pdf [file Table1.pdf]

**Table S1 Two hundred and twenty-seven differentially expressed genes in lung metastasis tissue in mice treated with GL-pp group compared with T+SF group.**

| Gene Symbol      | Majority Protein IDs                                                                             | -LgP    |
|------------------|--------------------------------------------------------------------------------------------------|---------|
| Iqsec1           | E9PUA3;A0A087WQ39;Q8R0S2;Q8R0S2-2                                                                | 1.46174 |
| Nudt16           | A0A087WRE5;Q6P3D0;A0A087WSB5                                                                     | 1.4719  |
| Arhgap21         | Q6DFV3;B7ZCJ0;A0A0A0MQE8;B7ZCJ1;G3UWM5                                                           | 1.47788 |
| Nptn             | A0A0A0MQN8;H3BIX4;Z4YLB7;P97300-3;P97300-1;P97300                                                | 1.4315  |
| Rab3gap2         | Q8BMG7;A0A0A6YWM5;E9QKE4                                                                         | 2.13792 |
| Mast4;Mast2      | E9PWX8;E9QPR4;A0A0A6YXG1;Q811L6;E9Q6G0;E9Q4Q9;Q811L6-2;E9Q1M8;B1AST8;Q60592;B1AST7;E9QLW6;E9Q1Q1 | 1.54809 |
| Kiaa1522         | A2A7S8-2;A2A7S8-3;A2A7S8;A2A7S8-4                                                                | 2.04034 |
| Dock11           | A2AF47;A2AF67                                                                                    | 2.27421 |
| Ubr4             | A2AN08-3;A2AN08;A2AN08-5                                                                         | 1.31362 |
| Aqr              | A2AQA7;Q8CFQ3                                                                                    | 1.6308  |
| Tp53bp1;Trp53bp1 | P70399;A2AU91;P70399-3;A2AU89;P70399-2                                                           | 1.96478 |
| Dab2ip           | Q3UHC7-2;F6RK07;A2AUX5;Q3UHC7-4;A2AUX3;Q3UHC7-3;B7ZD29;Q3UHC7;F6QQP6                             | 1.57137 |
| Dennd3           | A2RT67;G3UYA1;F7B6S5                                                                             | 1.46691 |
| Ttc38            | A3KMP2;A3KMP2-2                                                                                  | 2.82207 |
| Chp1             | B0R091;P61022                                                                                    | 1.88011 |
| Ssbp3            | Q9D032-2;B1AS37;Q9D032                                                                           | 3.18845 |
| Grb2             | B1AT92;Q60631;Q60631-2                                                                           | 2.57596 |
| Hgs              | B1ATZ0;B1ATZ1;Q99LI8;Q3UMA3;B1ATY9                                                               | 1.54796 |
| Aifm1            | B1AU25;Q9Z0X1                                                                                    | 2.37571 |
| Mtm1             | B1AW21;Q9Z2C5                                                                                    | 1.7601  |
| Dock5            | B2RY04                                                                                           | 1.37987 |
| Finc             | Q8VHX6-2;D3YW87;Q8VHX6;D3Z576                                                                    | 1.36591 |
| Tmem109          | D3Z7P2;D3Z3Z2;D3YX08;D3Z0I8;Q3UBX0                                                               | 1.52107 |
| Snrk             | D3Z1F6;Q8VDU5                                                                                    | 2.29587 |
| Fip1l1           | Q9D824-4;D3Z619;Q9D824-3;Q9D824-2;Q9D824;D3Z3F1;D3Z4V2                                           | 1.77142 |
| Plid1            | Q9Z280;D6RH77;Q9Z280-2;Q6NVF2;F6WKY8                                                             | 1.63769 |
| Mob4             | E0CXA9;Q6PEB6;E0CYJ0;G8JL35                                                                      | 1.34826 |
| Urb1             | Q571H0;E9PU96                                                                                    | 1.73503 |
| Csnk1a1          | E9Q4G7;Q8BK63;E9Q3W1;E9PWB2;Q8BK63-2;H7BXB1;E9Q2U6;F6YBC9                                        | 1.39774 |
| Lpin2            | Q99PI5;E9PWN0                                                                                    | 2.28276 |
| Itsn1            | Q9Z0R4;E9Q0N0;E9Q3I4;Q9Z0R4-2;E9Q3I5;E9Q3I8;E9Q3I9                                               | 1.55464 |
| Gm15800          | E9Q2E4;E9PX61                                                                                    | 1.8388  |
| Pi4ka            | E9Q3L2                                                                                           | 1.69168 |
| Kif14;kif14      | E9Q3T3;L0N7N1                                                                                    | 2.32863 |
| Mvp              | Q9EQK5;E9Q3X0                                                                                    | 2.06793 |
| Nbas             | E9Q411                                                                                           | 2.30592 |
| Dctn1            | E9Q586;O08788-2;E9Q3M3;O08788;D3YX34                                                             | 1.58502 |

|          |                                          |         |
|----------|------------------------------------------|---------|
| Myo1e    | E9Q634                                   | 1.37397 |
| Mllt4    | E9Q9C3                                   | 1.36837 |
| Ccdc93   | E9QAD4;Q7TQK5                            | 1.37062 |
| Chd4     | E9QAS4;Q6PDQ2;E9QAS5                     | 1.47152 |
| Shroom3  | Q9QXN0-3;E9QMY5;Q9QXN0-4;Q9QXN0;Q9QXN0-2 | 1.34679 |
| Itsn2    | E9QNG1;Q9Z0R6;Q9Z0R6-2                   | 1.90506 |
| Vwf      | Q8CIZ8;E9QPU1                            | 1.70974 |
| Col18a1  | P39061-2;P39061-1;P39061;E9QPX1          | 2.14233 |
| lqce     | F6R782;Q6PCQ0-2;Q6PCQ0                   | 1.45197 |
| Ctss     | O70370;F6WR04                            | 1.56976 |
| Spef1    | F6ZW13;Q99JL1                            | 1.57958 |
| Agap3    | Q8VHH5;F8VQE9;Q8VHH5-2                   | 1.52072 |
| Sash1    | P59808;F8VQK5                            | 1.90949 |
| Sftpb    | S4R2L6;F8WKG6;P50405;S4R1N7;S4R239       | 2.08077 |
| Ddx24    | Q9ESV0;F8WJAO                            | 1.32537 |
| Zc3h18   | Q0P678;G3X8T2;H3BIW0;H3BJJ9              | 2.066   |
| Ctsa     | P16675;G3X8T3                            | 1.45249 |
| Dnm2     | G3X9G4;Q3TCR7                            | 1.33661 |
| Ckap5    | K3W4R5;Z4YL78;A2AGT5-3;A2AGT5;A2AGT5-2   | 1.65777 |
| Serpnb6b | O08804;F7B9A0                            | 2.60254 |
| Cyth3    | O08967;G5E8Q4                            | 1.63327 |
| Srsf5    | O35326;Q9D8S5                            | 1.41643 |
| Anxa8    | O35640;Q921D0                            | 1.87681 |
| Sptlc1   | O35704                                   | 1.38061 |
| Gp1ba    | O35930                                   | 2.04769 |
| Ddost    | O54734                                   | 2.13331 |
| Rpl35a   | O55142                                   | 1.83453 |
| Mmp8     | O70138                                   | 1.60971 |
| Hmox2    | O70252;D3YX62                            | 1.37959 |
| Sorl1    | O88307                                   | 2.05796 |
| Plin4    | O88492-2;O88492                          | 1.61097 |
| Mb       | P04247                                   | 1.3543  |
| H1f0     | P10922                                   | 1.87662 |
| Umps     | P13439                                   | 1.45934 |
| Hspb1    | P14602;P14602-2;D3YZ06;P14602-3          | 1.50879 |
| Hist1h1c | P15864                                   | 1.47504 |
| Mut      | P16332                                   | 1.83928 |
| Ubl4a    | P21126                                   | 1.47862 |
| Tgm2     | P21981                                   | 1.4393  |
| Pdgfra   | P26618;P26618-2                          | 1.45752 |
| Rpl3     | P27659                                   | 1.33626 |
| Adss1    | P28650;P28650-2;J3QN31                   | 3.40216 |
| Kras     | P32883-2                                 | 1.87109 |

|                |                                                     |         |
|----------------|-----------------------------------------------------|---------|
| Ptk2           | P34152-3;P34152-4;P34152-2;P34152;P34152-6;P34152-5 | 1.41824 |
| Csk            | P41241                                              | 2.33919 |
| Hist1h1b       | P43276                                              | 1.66268 |
| Adss           | P46664                                              | 1.86516 |
| Yap1           | P46938-2;P46938;G3UYA6;G3UY62;G3UYV4;G3UYW7         | 1.30736 |
| Aldh3a1        | P47739                                              | 1.881   |
| Lmna           | P48678;P48678-2;P48678-3                            | 1.60338 |
| Hsd17b8;H2-Ke6 | P50171;P50171-2;G3UX44                              | 1.7054  |
| Usp10          | P52479-2;P52479                                     | 1.37132 |
| Nub1           | P54729                                              | 1.4769  |
| Cox6b1         | P56391                                              | 1.83554 |
| Rin3           | P59729;Q3U332                                       | 1.33989 |
| Magoh;Magohb   | P61327;Q9CQL1;A0A023T778;G3UZW7;G3UYI5              | 1.34429 |
| Copz1          | P61924                                              | 1.50386 |
| Rps8           | P62242                                              | 1.61337 |
| Rpl18a         | P62717                                              | 1.47665 |
| Mtpn           | P62774                                              | 1.7234  |
| Hist1h4a       | P62806                                              | 1.48535 |
| Rpl30          | P62889                                              | 1.58856 |
| Rpl32          | P62911                                              | 1.80634 |
| Rpl8           | P62918                                              | 1.7102  |
| Crnkl1         | P63154                                              | 1.55864 |
| Rps17          | P63276                                              | 1.5743  |
| Stim1          | P70302                                              | 1.52051 |
| Slc9a3r1       | P70441                                              | 1.37481 |
| Cct5           | P80316                                              | 1.36414 |
| Fmo3           | P97501                                              | 1.38488 |
| Lypla1         | P97823;P97823-2;J3QP56;D3YUG4;D3Z111                | 1.44748 |
| Cab39          | Q06138                                              | 1.40014 |
| Dnajb2         | Q9QYI5-2;Q9QYI5;Q3TB24                              | 1.56135 |
| Hp1bp3         | Q3TEA8-2;Z4YKB8;Q3TEA8;Z4YKA3;Q3TEA8-3;A2AM65       | 1.48437 |
| Lpcat1         | Q3TFD2;Q3TFD2-2;Q3TFD2-3                            | 1.56185 |
| Pde12          | Q3TIU4                                              | 2.10927 |
| Zc3h15         | Q3TIV5                                              | 1.45454 |
| Ap5z1          | Q3U829                                              | 1.425   |
| Lbr            | Q3U9G9;A0A0A6YY12                                   | 3.38316 |
| Parva          | Q3UF75;Q9EPC1                                       | 1.42049 |
| Plekha7        | Q3UIL6-3;Q3UIL6-4;Q3UIL6-5;Q3UIL6;Q3UIL6-6;Q3UIL6-2 | 1.31966 |
| Sf3b2          | Q3UJB0                                              | 1.50682 |
| Parp3          | Q8CFB8;Q3ULW8                                       | 1.35497 |
| Nme7           | Q8BUH2;Q9QXL8;Q3UMG6                                | 2.04517 |
| Iqgap2         | Q3UQ44                                              | 1.89883 |
| Rcsd1          | Q3UZA1-2;Q3UZA1                                     | 1.44466 |

|          |                                                 |         |
|----------|-------------------------------------------------|---------|
| Phactr4  | Q501J7-2;Q501J7;Q501J7-3                        | 1.5586  |
| Thrap3   | Q8BZN7;Q569Z6                                   | 1.3066  |
| Lrrk2    | Q5S006                                          | 1.81123 |
| Tom1l2   | Q5SRX1;Q5SRX1-2;Q5SRX1-3;Q5SRX1-4;Q5SXA5;Q5SXA4 | 1.41588 |
| Clint1   | Q5SUH6;Q5SUH7;Q99KN9-2;Q99KN9                   | 2.24784 |
| Lama2    | Q60675;A0A087WRP2                               | 1.4191  |
| Aplp2    | Q60709;Q06335-2;Q06335                          | 1.76368 |
| Stxbp3   | Q60770;Q60770-2                                 | 1.38385 |
| Pml      | Q60953;D3Z3A6;D3YXR5;Q60953-2;F7BTZ2            | 2.93636 |
| Hcfc1    | Q61191;B1AUX2                                   | 1.70043 |
| Arhgdib  | Q61599                                          | 1.5929  |
| Kif5b    | Q61768;E9QAK5                                   | 1.86392 |
| Mrc1     | Q61830                                          | 1.37078 |
| Aebp1    | Q640N1;Q640N1-2                                 | 1.73289 |
| Sord     | Q64442                                          | 1.75467 |
| Tpm4     | Q6IRU2                                          | 1.33851 |
| Rrp12    | Q6P5B0                                          | 1.33256 |
| Kif15    | Q6P9L6                                          | 1.36106 |
| Fkbp15   | Q6P9Q6;Q6P9Q6-2;Q80YW9                          | 1.33296 |
| Nostrin  | Q6WKZ7                                          | 2.0936  |
| Kctd12   | Q6WVG3                                          | 1.52664 |
| Acap2    | Q6ZQK5;Q6ZQK5-2                                 | 1.44803 |
| Rpl36    | Q6ZWZ4                                          | 1.43883 |
| Fbxo22   | Q78JE5;Q3V492                                   | 2.19012 |
| Fam98b   | Q80VD1                                          | 1.31913 |
| Aldh3b1  | Q80VQ0                                          | 1.42528 |
| Crybg3   | Q80W49;Q80W49-2;Q80W49-3                        | 2.6132  |
| Tbc1d10b | Q8BHL3                                          | 1.33971 |
| Srsf7    | Q8BL97-4;Q8BL97-2;Q8BL97;Q8BL97-3               | 1.505   |
| Ckap4    | Q8BMK4                                          | 1.48036 |
| Hadha    | Q8BMS1                                          | 1.4617  |
| Metap1   | Q8BP48                                          | 1.78691 |
| Heatr3   | Q8BQM4;E9PWH6                                   | 1.31314 |
| Cpsf7    | Q8BTV2-2;Q8BTV2;Q8BTV2-3                        | 2.58635 |
| Pdcl3    | Q8BVF2                                          | 1.87185 |
| Zhx2     | Q8C0C0                                          | 1.32492 |
| Sipa1l1  | Q8C0T5-2;Q8C0T5                                 | 1.34859 |
| Rbm14    | Q8C2Q3;E9QL13;Q8C2Q3-2                          | 2.37903 |
| Nemf     | Q8CCP0;Q8CCP0-3;Q8CCP0-2;Q8CCP0-4               | 1.63093 |
| Uaca     | Q8CGB3;Q8CGB3-3;Q8CGB3-2                        | 1.4111  |
| Sltm     | Q8CH25-2;Q8CH25                                 | 1.63984 |
| Gmds     | Q8K0C9                                          | 1.4818  |
| Alkbh3   | Q8K1E6;A2AKV6;A2AKV7                            | 1.64407 |

|           |                                   |         |
|-----------|-----------------------------------|---------|
| Spats2    | Q8K1N4;Q8K1N4-2                   | 1.58534 |
| ptplad1   | Q8K2C9                            | 1.62078 |
| Ndufs8    | Q8K3J1                            | 1.57    |
| Trem1     | Q8K558;Q8K558-2                   | 1.47488 |
| Rab11fip5 | Q8R361                            | 2.09643 |
| Nup35     | Q8R4R6;A2ATJ2                     | 1.35718 |
| Luzp1     | Q8R4U7                            | 2.18108 |
| Gstm4     | Q8R5I6;A2AE91                     | 1.66118 |
| Hpgd      | Q8VCC1                            | 1.3219  |
| Sirt2     | Q8VDQ8-2;Q8VDQ8;Q8VDQ8-4;Q8VDQ8-3 | 2.3846  |
| Lmcd1     | Q8VEE1                            | 1.3299  |
| Wdr13     | S4R225;Q91V09                     | 1.66899 |
| Memo1     | Q91VH6                            | 1.89924 |
| Rnh1      | Q91VI7                            | 1.43073 |
| Setd3     | Q91WC0;F2Z420;F2Z438;Q91WC0-2     | 1.31814 |
| Dnajc9    | Q91WN1                            | 1.32588 |
| Golm1     | Q91XA2                            | 1.35313 |
| N/A       | Q91Z58                            | 1.38409 |
| Srgap2    | Q91Z67;A0A087WNNM1;A0A087WSQ1     | 1.96632 |
| Pcca      | Q91ZA3                            | 1.52351 |
| Als2      | Q920R0                            | 1.57499 |
| Plrg1     | Q922V4;D3Z4V1;F8WI31              | 1.46748 |
| Hadhb     | Q99JY0                            | 1.30781 |
| Vwa5a     | Q99KC8                            | 1.35828 |
| Prpf19    | Q99KP6;Q99KP6-2;Q99KP6-3          | 1.51862 |
| Mtfr1     | Q99MB2;D3YZ89                     | 2.19893 |
| Vimp      | Q9BCZ4                            | 1.39722 |
| Mgst3     | Q9CPU4                            | 1.7665  |
| Ndufa2    | Q9CQ75                            | 1.82202 |
| Rpl21     | Q9CQM8;O09167                     | 1.35673 |
| Txndc12   | Q9CQU0                            | 1.65926 |
| Rer1      | Q9CQU3                            | 1.34536 |
| Ndufb3    | Q9CQZ6                            | 1.3097  |
| Ndufab1   | Q9CR21;F6ZFT1;F8WJ64              | 1.48671 |
| Gdpd1     | Q9CRY7                            | 1.91877 |
| Pcbd2     | Q9CZL5                            | 2.51889 |
| Tsfm      | Q9CZR8                            | 1.58803 |
| Tmed10    | Q9D1D4                            | 1.49567 |
| Tbcb      | Q9D1E6                            | 1.9512  |
| Mrpl19    | Q9D338                            | 1.34735 |
| Rpl22l1   | Q9D7S7-2;Q9D7S7                   | 1.67329 |
| Ccdc91    | Q9D8L5                            | 2.30968 |
| Slirp     | Q9D8T7;Q9D8T7-2;F8WHU8            | 2.88711 |

---

|         |                          |         |
|---------|--------------------------|---------|
| Selo    | Q9DBC0;S4R1U9            | 1.81485 |
| Ftsj3   | Q9DBE9                   | 2.15269 |
| Twsg1   | Q9EP52                   | 1.84058 |
| Nek7    | Q9ES74                   | 1.47976 |
| Dkc1    | Q9ESX5;B7ZCL7            | 1.44913 |
| Ccdc22  | Q9JIG7                   | 1.65908 |
| Sh3bgrl | Q9JJU8                   | 2.68702 |
| Pin1    | Q9QUR7                   | 1.9669  |
| Naga    | Q9QWR8                   | 2.24772 |
| Pkp3    | Q9QY23;Q9QY23-2          | 1.72004 |
| 6-Sep   | Q9R1T4-2;Q9R1T4-3;Q9R1T4 | 1.54808 |
| Skp1    | Q9WTX5                   | 1.48793 |
| Pdcd6ip | Q9WU78;Q9WU78-3          | 1.37526 |
| Fam50a  | Q9WV03                   | 1.39758 |
| Snx1    | Q9WV80                   | 1.63159 |
| Timm8a1 | Q9WVA2                   | 1.61501 |
| Nfkb1a  | Q9Z1E3                   | 1.35614 |
| Abhd16a | Q9Z1Q2                   | 2.29504 |
